# Supplementary material
Source: Springer Nature journal article supplement (https://www.springermedizin.de/resource/supplementary/10194_2014_1015_MOESM1_ESM.pdf/9423376)

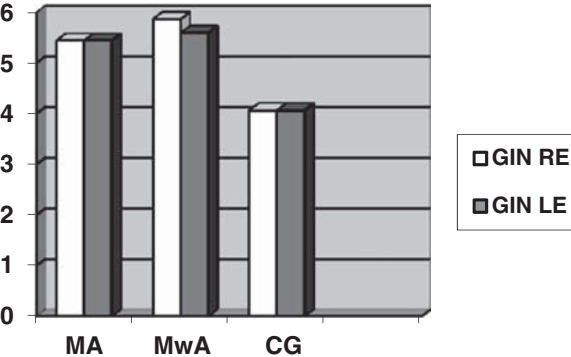

Supplement: MOESM1 [file 9423376]
